# Supplementary material for: White-light-emitting flexible display devices based on double network hydrogels crosslinked by YAG:Ce phosphors
Source: Royal Society of Chemistry journal article supplement (doi:10.1039/c9tc05311e), 2019-11-20
Supplement: c9tc05311e1.pdf [file c9tc05311e1.pdf]

## Supporting Information

### **White-light-emitting flexible display devices based on double network hydrogels crosslinked by YAG:Ce phosphors**

Yawen Xu,<sup>ab</sup> Jing Chen,<sup>\*b</sup> Hua Zhang,<sup>b</sup> Hua Wei,<sup>b</sup> Linjie Zhou,<sup>b</sup> Zhenwu Wang,<sup>b</sup>

Yuexiao Pan,<sup>d</sup> Xinyan Su,<sup>a</sup> Afang Zhang,<sup>a</sup> Jun Fu<sup>\*bc</sup>

a. School of Materials Science and Engineering, Shanghai University, 99 Shangda Road, Shanghai 200444, China.

b. Ningbo Institute of Materials Technology & Engineering, Chinese Academy of Sciences, 1219 Zhongguan West Road, Ningbo 315201, China.

c. School of Materials Science and Engineering, Sun Yat-sen University, 135 Xingang Road West, Guangzhou 510275, China.

d. College of Chemistry and Materials Engineering, Wenzhou University, Wenzhou 325035, China.

Corresponding authors: J. Chen (jing.chen@nimte.ac.cn) or J. Fu (fujun8@mail.sysu.edu.cn)

**Table S1.** The CIE coordinates of coated LED by varying the current of blue LED lump.

|   | 20 mA  | 18 mA  | 16 mA  | 14 mA  | 12 mA  | 10 mA  | 8 mA   | 6 mA   | 4 mA   | 2 mA   |
|---|--------|--------|--------|--------|--------|--------|--------|--------|--------|--------|
| X | 0.3303 | 0.3312 | 0.3312 | 0.3314 | 0.3300 | 0.3299 | 0.3298 | 0.3295 | 0.3288 | 0.3277 |
| y | 0.3217 | 0.3281 | 0.3296 | 0.3314 | 0.3307 | 0.3329 | 0.3356 | 0.3390 | 0.3338 | 0.3416 |
